# Supplementary material for: Two-Phase Fermentation Systems for Microbial Production of Plant-Derived Terpenes
Source: MDPI journal article supplement (doi:10.3390/molecules29051127), 2024-03-02
Supplement: s1 [file s1]

# Two-Phase Fermentation Systems for Microbial Production of Plant-Derived Terpenes

Table S1. Summary of the fermentation results for monoterpenes, categorized by various chassis cells, fermentation types, the second phase, and production outputs.

| Monoterpenes | Chassis cells        | Fermentation types | Second phases        | Titers (mg/L) | References |
|--------------|----------------------|--------------------|----------------------|---------------|------------|
| geraniol     | <i>E. coli</i>       | bioreactor         | none                 | 78.8          | [1]        |
|              |                      | flask              | isopropyl myristate  | 2102.5        | [2]        |
|              |                      | bioreactor         | isopropyl myristate  | 13190         | [3]        |
|              |                      | bioreactor         | isopropyl myristate  | 2000          | [1]        |
|              |                      | flask              | n-decane             | 182.5         | [4]        |
|              |                      | flask              | n-decane             | 1119          | [5]        |
|              |                      | flask              | n-decane             | 300           | [6]        |
|              | <i>S. cerevisiae</i> | flask              | none                 | 5             | [7]        |
|              |                      | flask              | none                 | 36.04         | [8]        |
|              |                      | bioreactor         | n-dodecane           | 227           | [9]        |
|              |                      | bioreactor         | n-dodecane           | 293           | [10]       |
|              |                      | bioreactor         | n-dodecane           | 1690          | [11]       |
|              |                      | bioreactor         | isopropyl myristate  | 1680          | [12]       |
|              |                      | flask              | n-dodecane           | 15.2          | [13]       |
| limonene     | <i>C. glutamicum</i> | flask              | n-dodecane           | 435           | [14]       |
|              | <i>E. coli</i>       | flask              | n-dodecane           | 605           | [15]       |
|              |                      | flask              | n-dodecane           | 214           | [16]       |
|              |                      | flask              | isopropyl myristate  | 1290          | [17]       |
|              |                      | flask              | diisononyl phthalate | 37.8          | [18]       |
|              |                      | bioreactor         | diisononyl phthalate | 2700          | [19]       |
|              |                      | bioreactor         | diisononyl phthalate | 3630          | [20]       |
|              | <i>S. cerevisiae</i> | flask              | none                 | 62.31         | [21]       |
|              |                      | flask              | n-dodecane           | 0.12          | [22]       |
|              |                      | flask              | n-dodecane           | 1.48          | [23]       |
|              |                      | flask              | n-dodecane           | 2580          | [24]       |
|              |                      | flask              | n-dodecane           | 166           | [25]       |
|              |                      | flask              | n-dodecane           | 76            | [26]       |
|              |                      | bioreactor         | n-dodecane           | 2630          | [27]       |
|              | <i>R. toruloides</i> | flask              | isopropyl myristate  | 917           | [28]       |
|              |                      | flask              | isopropyl myristate  | 2230          | [29]       |
|              |                      | tube               | n-dodecane           | 393.5         | [30]       |
|              |                      | flask              | n-dodecane           | 358.1         | [31]       |
|              | <i>A. gossypii</i>   | flask              | n-dodecane           | 336.4         | [32]       |

|                  |                          |                          |                     |                     |       |      |
|------------------|--------------------------|--------------------------|---------------------|---------------------|-------|------|
| perillyl alcohol | <i>Y. lipolytica</i>     | flask                    | n-dodecane          | 23.56               | [33]  |      |
|                  |                          | bioreactor               | n-dodecane          | 165.3               | [34]  |      |
|                  | <i>Synechococcus sp.</i> |                          |                     |                     |       |      |
|                  |                          | flask                    | n-dodecane          | 4                   | [35]  |      |
|                  |                          | flask                    | n-dodecane          | 6.7                 | [36]  |      |
|                  | <i>cyanobacteria</i>     | flask                    | isopropyl myristate | 16.4                | [37]  |      |
|                  | <i>E. coli</i>           | flask                    | resin               | 105                 | [38]  |      |
|                  |                          | bioreactor               | n-dodecane          | 87                  | [39]  |      |
|                  | linalool                 | <i>E. coli</i>           | flask               | none                | 63    | [40] |
|                  |                          |                          | flask               | n-nonane            | 1054  | [41] |
|                  |                          | flask                    | n-dodecane          | 505                 | [42]  |      |
|                  |                          | flask                    | isopropyl myristate | 1250                | [43]  |      |
|                  |                          | bioreactor               | isopropyl myristate | 1523.2              | [44]  |      |
|                  | <i>S. cerevisiae</i>     | flask                    | none                | 0.095               | [45]  |      |
|                  |                          | bioreactor               | none                | 0.26                | [46]  |      |
|                  |                          | bioreactor               | none                | 23.45               | [47]  |      |
|                  |                          | bioreactor               | none                | 0.24                | [46]  |      |
|                  |                          | flask                    | isopropyl myristate | 53.14               | [48]  |      |
|                  |                          | flask                    | isopropyl myristate | 80.9                | [49]  |      |
|                  |                          | <i>Y. lipolytica</i>     | flask               | n-dodecane          | 6.96  | [50] |
| cinéole          |                          | flask                    | isopropyl myristate | 109.6               | [51]  |      |
|                  | <i>P. ananatis</i>       | tube                     | isopropyl myristate | 5600                | [52]  |      |
|                  |                          | bioreactor               | isopropyl myristate | 10900               | [53]  |      |
|                  | <i>E. coli</i>           | flask                    | n-dodecane          | 21                  | [54]  |      |
|                  |                          | flask                    | n-dodecane          | 653                 | [42]  |      |
|                  |                          | flask                    | n-nonane            | 116.8               | [55]  |      |
|                  |                          | bioreactor               | none                | 1100                | [56]  |      |
|                  | strictosidine            | <i>S. cerevisiae</i>     | flask               | none                | 0.5   | [57] |
|                  |                          |                          | bioreactor          | none                | 50    | [58] |
|                  | sabinene                 | <i>E. coli</i>           | flask               | none                | 150   | [59] |
| pinene           |                          | bioreactor               | none                | 2650                | [60]  |      |
|                  | <i>S. cerevisiae</i>     | flask                    | n-dodecane          | 17.5                | [61]  |      |
|                  | <i>E. coli</i>           | bioreactor               | none                | 970                 | [62]  |      |
|                  |                          | flask                    | n-dodecane          | 166.5               | [63]  |      |
|                  |                          | flask                    | n-dodecane          | 140                 | [59]  |      |
|                  |                          | flask                    | n-dodecane          | 104.6               | [64]  |      |
|                  |                          | <i>S. cerevisiae</i>     | flask               | isopropyl myristate | 11.7  | [65] |
|                  |                          | <i>C. glycerinogenes</i> | flask               | n-dodecane          | 6     | [66] |
|                  | myrcene                  | <i>E. coli</i>           | flask               | n-dodecane          | 58.19 | [67] |
|                  |                          |                          | flask               | isopropyl myristate | 1250  | [43] |

Abbreviation of microorganisms: *E. coli*: *Escherichia coli*; *S. cerevisiae*: *Saccharomyces cerevisiae*; *C. glutamicum*:

*Corynebacterium glutamicum*; *R. toruloides*: *Rhodotorula toruloides*; *A. gossypii*: *Ashbya gossypii*; *Y. lipolytica*: *Yarrowia lipolytica*; *P. ananatis*: *Pantoea ananatis*; *C. glycerinogenes*: *Candida glycerinogenes*

Table S2. Summary of the fermentation results for sesquiterpenes, categorized by various chassis cells, fermentation types, the second phase, and production outputs.

| Sesquiterpenes      | Chassis cells        | Fermentation types | Second phases       | Titers (mg/L) | References |
|---------------------|----------------------|--------------------|---------------------|---------------|------------|
| amorphadiene        | <i>E. coli</i>       | flask              | none                | 112.2         | [68]       |
|                     |                      | tube               | n-dodecane          | 180           | [69]       |
|                     |                      | flask              | n-dodecane          | 201           | [70]       |
|                     |                      | flask              | n-dodecane          | 290           | [71]       |
|                     |                      | flask              | n-dodecane          | 293           | [72]       |
|                     |                      | tube               | n-dodecane          | 300           | [73]       |
|                     |                      | flask              | n-dodecane          | 331.7         | [74]       |
|                     |                      | flask              | n-dodecane          | 404.8         | [75]       |
|                     |                      | flask              | n-dodecane          | 500           | [76]       |
|                     |                      | flask              | n-dodecane          | 700           | [77]       |
|                     |                      | flask              | n-dodecane          | 1400          | [78]       |
|                     |                      | bioreactor         | n-dodecane          | 500           | [79]       |
|                     |                      | bioreactor         | n-dodecane          | 3550          | [80]       |
|                     |                      | bioreactor         | n-dodecane          | 29700         | [81]       |
|                     |                      | bioreactor         | n-dodecane          | 30000         | [82]       |
|                     | <i>S. cerevisiae</i> | flask              | n-dodecane          | 0.6           | [83]       |
|                     |                      | flask              | n-dodecane          | 54.6          | [84]       |
|                     |                      | flask              | n-dodecane          | 64            | [73]       |
|                     |                      | flask              | n-dodecane          | 120           | [85]       |
|                     |                      | flask              | n-dodecane          | 153           | [86]       |
|                     |                      | flask              | n-dodecane          | 497           | [87]       |
|                     |                      | bioreactor         | n-dodecane          | 41000         | [88]       |
|                     |                      | flask              | isopropyl myristate | 4000          | [89]       |
|                     |                      | bioreactor         | methyl oleate       | 40000         | [89]       |
|                     |                      | bioreactor         | methyl oleate       | 25000         | [90]       |
|                     | <i>Y. lipolytica</i> | flask              | n-dodecane          | 171.5         | [91]       |
|                     | <i>R. toruloides</i> | bioreactor         | n-dodecane          | 36            | [92]       |
|                     | <i>B. subtilis</i>   | flask              | n-dodecane          | 20            | [93]       |
|                     | <i>S. elongatus</i>  | flask              | n-hexan/n-decane    | 19.8          | [94]       |
| $\alpha$ -farnesene | <i>E. coli</i>       | flask              | n-decane            | 380           | [95]       |
|                     |                      | flask              | n-decane            | 1100          | [96]       |
|                     | <i>S. cerevisiae</i> | bioreactor         | n-dodecane          | 23.37         | [97]       |
|                     |                      | flask              | n-dodecane          | 1477.2        | [98]       |

|                      |                          |                      |                    |                    |        |       |
|----------------------|--------------------------|----------------------|--------------------|--------------------|--------|-------|
| β-farnesene          | <i>Y. lipolytica</i>     | bioreactor           | n-dodecane         | 930                | [99]   |       |
|                      |                          | bioreactor           | n-dodecane         | 170                | [100]  |       |
|                      |                          | bioreactor           | n-dodecane         | 10400              | [98]   |       |
|                      |                          | bioreactor           | poly alpha olefins | 130000             | [84]   |       |
|                      |                          | flask                | n-dodecane         | 1700               | [101]  |       |
|                      |                          | bioreactor           | n-dodecane         | 260                | [102]  |       |
|                      |                          | bioreactor           | n-dodecane         | 10200              | [103]  |       |
|                      |                          | bioreactor           | n-dodecane         | 2570               | [104]  |       |
|                      | <i>S. elongatus</i>      | bioreactor           | n-dodecane         | 25550              | [101]  |       |
|                      |                          | flask                | n-dodecane         | 4.6                | [105]  |       |
|                      |                          | Not mentioned        | n-dodecane         | 1.2                | [106]  |       |
|                      | <i>P. pastoris</i>       | flask                | n-dodecane         | 2560               | [107]  |       |
|                      | <i>Anabaena sp.</i>      | flask                | resin              | 0.3054             | [108]  |       |
|                      | <i>E. coli</i>           | flask                | n-decane           | 5290               | [109]  |       |
|                      |                          | bioreactor           | n-decane           | 10310              | [110]  |       |
|                      |                          | bioreactor           | n-decane           | 8740               | [111]  |       |
|                      |                          | bioreactor           | n-decane           | 4060               | [112]  |       |
|                      |                          | <i>S. cerevisiae</i> | bioreactor         | poly alpha olefins | 130000 | [84]  |
|                      |                          | <i>Y. lipolytica</i> | glass tubes        | n-dodecane         | 955    | [113] |
|                      |                          | bioreactor           | n-decane           | 22800              | [114]  |       |
| bisabolene           |                          | <i>E. coli</i>       | tube               | n-dodecane         | 1100   | [115] |
|                      |                          | flask                | n-dodecane         | 1150               | [116]  |       |
|                      |                          | flask                | n-dodecane         | 0.435              | [117]  |       |
|                      |                          | bioreactor           | n-dodecane         | 900                | [118]  |       |
| <i>S. cerevisiae</i> |                          | bioreactor           | canola oil         | 9100               | [119]  |       |
|                      |                          | flask                | n-dodecane         | 900                | [118]  |       |
|                      | flask                    | n-dodecane           | 994                | [118]              |        |       |
|                      | bioreactor               | n-dodecane           | 5200               | [88]               |        |       |
|                      | <i>Synechococcus sp.</i> | flask                | n-dodecane         | 0.6                | [35]   |       |
|                      |                          | bioreactor           | n-dodecane         | 22.5               | [120]  |       |
| nerolidol            | <i>C. reinhardtii</i>    | flask                | n-dodecane         | 11                 | [121]  |       |
|                      | <i>R. toruloides</i>     | bioreactor           | n-dodecane         | 680                | [92]   |       |
|                      | <i>E. coli</i>           | bioreactor           | n-dodecane         | 16000              | [122]  |       |
|                      | <i>S. cerevisiae</i>     | flask                | n-dodecane         | 100                | [123]  |       |
|                      | flask                    | n-dodecane           | 497                | [124]              |        |       |
|                      | flask                    | n-dodecane           | 392                | [125]              |        |       |
|                      | bioreactor               | n-dodecane           | 1711               | [126]              |        |       |
|                      | bioreactor               | n-dodecane           | 5500               | [125]              |        |       |
| α-humulene           | bioreactor               | n-dodecane           | 7010               | [127]              |        |       |
|                      | <i>E. coli</i>           | bioreactor           | resin              | 60.2               | [128]  |       |

|                        |                          |                       |                     |                     |       |       |
|------------------------|--------------------------|-----------------------|---------------------|---------------------|-------|-------|
| patchoulol             | <i>S. cerevisiae</i>     | bioreactor            | n-dodecane          | 958                 | [129] |       |
|                        |                          | bioreactor            | n-dodecane          | 1726.78             | [130] |       |
|                        |                          | <i>E. coli</i>        | bioreactor          | n-dodecane          | 970   | [131] |
|                        |                          | bioreactor            | isooctane           | 40                  | [132] |       |
|                        |                          | <i>S. cerevisiae</i>  | flask               | n-dodecane          | 42.1  | [133] |
| valencene              | <i>S. cerevisiae</i>     | bioreactor            | n-dodecane          | 467                 | [134] |       |
|                        |                          | bioreactor            | n-dodecane          | 1632                | [135] |       |
|                        |                          | flask                 | n-dodecane          | 31                  | [136] |       |
|                        |                          | flask                 | n-dodecane          | 1.305               | [137] |       |
|                        |                          | bioreactor            | n-dodecane          | 264.6               | [138] |       |
| germacrene A           | <i>Y. lipolytica</i>     | flask                 | n-dodecane          | 22.8                | [139] |       |
|                        | <i>C. glutamicum</i>     | flask                 | n-dodecane          | 2.41                | [140] |       |
|                        | <i>R. sphaeroides</i>    | flask                 | n-dodecane          | 352                 | [141] |       |
|                        | <i>Synechocystis sp.</i> | flask                 | isopropyl myristate | 9.6                 | [142] |       |
|                        | <i>E. coli</i>           | flask                 | none                | 6.325               | [143] |       |
|                        | <i>S. cerevisiae</i>     | flask                 | n-dodecane          | 126.4               | [144] |       |
|                        |                          | flask                 | n-dodecane          | 364.26              | [145] |       |
|                        |                          | bioreactor            | n-dodecane          | 3520                | [146] |       |
|                        |                          | flask                 | n-dodecane          | 375                 | [147] |       |
|                        |                          | flask                 | n-dodecane          | 190                 | [148] |       |
|                        |                          | flask                 | n-dodecane          | 469                 | [149] |       |
|                        |                          | flask                 | n-dodecane          | 309.8               | [150] |       |
|                        | <i>P. pastoris</i>       | bioreactor            | n-dodecane          | 1900                | [151] |       |
|                        | <i>O. polymorpha</i>     | bioreactor            | n-dodecane          | 4700                | [152] |       |
|                        | $\alpha$ -santalene      | <i>Y. lipolytica</i>  | bioreactor          | isopropyl myristate | 39000 | [153] |
| <i>E. coli</i>         |                          | bioreactor            | isopropyl myristate | 2916                | [154] |       |
| <i>S. cerevisiae</i>   |                          | flask                 | n-dodecane          | 92                  | [155] |       |
| $\beta$ -caryophyllene | <i>Y. lipolytica</i>     | bioreactor            | n-dodecane          | 163                 | [156] |       |
|                        |                          | bioreactor            | n-dodecane          | 27.92               | [157] |       |
|                        |                          | <i>E. coli</i>        | flask               | none                | 100   | [158] |
|                        |                          | bioreactor            | none                | 1520                | [159] |       |
|                        |                          | bioreactor            | none                | 1050                | [160] |       |
| $\alpha$ -cuprenene    | <i>S. cerevisiae</i>     | bioreactor            | n-dodecane          | 5142                | [161] |       |
|                        |                          | bioreactor            | n-dodecane          | 2949.1              | [162] |       |
|                        |                          | <i>X. dendrorhous</i> | flask               | n-dodecane          | 80    | [163] |
| viridiflorol           | <i>E. coli</i>           | bioreactor            | n-dodecane          | 25700               | [82]  |       |
| longifolene            | <i>E. coli</i>           | bioreactor            | n-decane            | 382                 | [164] |       |
| (+)-zizaene            | <i>E. coli</i>           | bioreactor            | resin               | 211                 | [165] |       |
| valerenadiene          | <i>E. coli</i>           | flask                 | n-decane            | 62                  | [166] |       |
| protoilludene          | <i>E. coli</i>           | flask                 | n-decane            | 1199                | [167] |       |
| farnesol               | <i>E. coli</i>           | flask                 | methyl oleate       | 1419                | [168] |       |

|                      |                      |            |            |        |       |
|----------------------|----------------------|------------|------------|--------|-------|
|                      | <i>S. cerevisiae</i> | flask      | none       | 70     | [169] |
| epi-isozizaene       | <i>E. coli</i>       | bioreactor | n-decane   | 727.9  | [170] |
| $\alpha$ -isocomene  | <i>E. coli</i>       | bioreactor | n-decane   | 77.5   | [170] |
| pentalenene          | <i>E. coli</i>       | bioreactor | n-decane   | 780.3  | [170] |
| $\alpha$ -neoclovene | <i>S. cerevisiae</i> | bioreactor | n-dodecane | 487.1  | [162] |
| valerenic acid       | <i>S. cerevisiae</i> | flask      | n-dodecane | 4      | [171] |
| zerumbone            | <i>S. cerevisiae</i> | bioreactor | n-dodecane | 40     | [172] |
| prespatane           | <i>R. toruloides</i> | bioreactor | n-dodecane | 1173.6 | [173] |
| santalols            | <i>S. cerevisiae</i> | bioreactor | n-dodecane | 1300   | [174] |
| $\alpha$ -santalol   | <i>S. cerevisiae</i> | bioreactor | n-dodecane | 1200   | [174] |
| zerumbone            | <i>S. cerevisiae</i> | bioreactor | n-dodecane | 40     | [172] |

Abbreviation of microorganisms: *B. subtilis*: *Bacillus subtilis*; *S. elongatus*: *Synechococcus elongatus*; *P. pastoris*: *Pichia pastoris*; *C. reinhardtii*: *Chlamydomonas reinhardtii*; *R. sphaeroides*: *Rhodobacter sphaeroides*; *O. polymorpha*: *Ogataea polymorpha*; *X. dendrorhous*: *Xanthophyllomyces dendrorhous*

Table S3. Summary of the fermentation results for diterpenes, categorized by various chassis cells, fermentation types, the second phase, and production outputs.

| Diterpenes         | Chassis cells        | Fermentation types   | Second phases        | Titers (mg/L)  | References     |       |
|--------------------|----------------------|----------------------|----------------------|----------------|----------------|-------|
| miltiradiene       | <i>S. cerevisiae</i> | bioreactor           | none                 | 488            | [175]          |       |
|                    |                      | flask                | n-dodecane           | 550            | [176]          |       |
|                    |                      | bioreactor           | n-dodecane           | 365            | [177]          |       |
|                    |                      | bioreactor           | n-dodecane           | 3500           | [176]          |       |
| gibberellic acid 3 | <i>Y. lipolytica</i> | 24-roundwell plates  | none                 | 12.8           | [178]          |       |
| gibberellic acid 4 | <i>Y. lipolytica</i> | 24-roundwell plates  | none                 | 17.3           | [178]          |       |
| taxadiene          | <i>E. coli</i>       | flask                | none                 | 1.3            | [179]          |       |
|                    |                      | flask                | n-dodecane           | 570            | [180]          |       |
|                    |                      | bioreactor           | n-dodecane           | 1000           | [181]          |       |
|                    |                      | bioreactor           | n-dodecane           | 1020           | [181]          |       |
|                    | <i>S. cerevisiae</i> | bioreactor           | none                 | 33             | [182]          |       |
|                    |                      | flask                | silica gel           | 8              | [183]          |       |
|                    |                      | bioreactor           | n-dodecane           | 129            | [184]          |       |
|                    |                      | bioreactor           | n-dodecane           | 127            | [184]          |       |
|                    |                      | <i>A. fumigatus</i>  | flask                | immobilization | 0.694          | [185] |
|                    |                      |                      | <i>A. tenuissima</i> | flask          | immobilization | 0.388 |
|                    | oxygenated taxane    | <i>S. cerevisiae</i> | bioreactor           | n-dodecane     | 78             | [186] |
|                    | ent-kaurene          | <i>E. coli</i>       | bioreactor           | none           | 578            | [187] |
|                    |                      |                      | bioreactor           | n-dodecane     | 624            | [188] |
|                    |                      | <i>R. toruloides</i> | bioreactor           | n-dodecane     | 1400           | [189] |
| geranylgeraniol    |                      | <i>S. cerevisiae</i> | bioreactor           | none           | 3300           | [190] |
|                    | flask                |                      | n-dodecane           | 374.02         | [191]          |       |
|                    | flask                |                      | n-dodecane           | 772.98         | [191]          |       |
|                    | bioreactor           |                      | n-dodecane           | 1310           | [192]          |       |

|                  |                      |            |                     |       |       |
|------------------|----------------------|------------|---------------------|-------|-------|
| steviol          | <i>E. coli</i>       | bioreactor | n-dodecane          | 5070  | [191] |
|                  |                      | bioreactor | none                | 1100  | [193] |
|                  |                      | bioreactor | n-dodecane          | 38.4  | [188] |
| carnosic acid    | <i>S. cerevisiae</i> | flask      | none                | 25    | [194] |
|                  |                      | bioreactor | none                | 75.2  | [194] |
| sclareol         | <i>E. coli</i>       | bioreactor | n-dodecane          | 1500  | [195] |
|                  | <i>S. cerevisiae</i> | flask      | n-dodecane          | 750   | [196] |
|                  |                      | flask      | n-dodecane          | 403   | [197] |
| levopimaradiene  | <i>E. coli</i>       | bioreactor | n-hexane            | 11400 | [198] |
|                  |                      | bioreactor | n-dodecane          | 700   | [199] |
|                  |                      | bioreactor | n-dodecane          | 400.3 | [200] |
| levopimaric acid | <i>S. cerevisiae</i> | bioreactor | n-dodecane          | 400.3 | [200] |
|                  |                      | bioreactor | none                | 1400  | [201] |
| rubusoside       | <i>S. cerevisiae</i> | bioreactor | none                | 1369  | [201] |
|                  |                      | bioreactor | none                | 132.7 | [201] |
|                  |                      | bioreactor | none                | 132.7 | [201] |
| rebaudiosides    | <i>S. cerevisiae</i> | bioreactor | none                | 132.7 | [201] |
| retinoids        | <i>E. coli</i>       | tube       | n-dodecane          | 33    | [202] |
| retinol          | <i>S. cerevisiae</i> | bioreactor | n-dodecane          | 2349  | [203] |
|                  | <i>Y. lipolytica</i> | bioreactor | n-dodecane          | 4860  | [204] |
| 13R-manoyl oxide | <i>S. cerevisiae</i> | bioreactor | n-dodecane          | 3000  | [205] |
| forskolin        | <i>S. cerevisiae</i> | flask      | n-hexane            | 40    | [206] |
| cis-abienol      | <i>E. coli</i>       | bioreactor | isopropyl myristate | 634   | [207] |

Abbreviation of microorganisms: *A. fumigatus*: *Aspergillus fumigatus*; *A. tenuissima*: *Alternaria tenuissima*

Table S4. Summary of the fermentation results for triterpenes, categorized by various chassis cells, fermentation types, the second phase, and production outputs.

| Triterpenes      | Chassis cells        | Fermentation types | Second phases | Titers (mg/L) | References |
|------------------|----------------------|--------------------|---------------|---------------|------------|
| squalene         | <i>S. cerevisiae</i> | bioreactor         | none          | 445.6         | [208]      |
|                  |                      | bioreactor         | none          | 9472          | [209]      |
|                  |                      | bioreactor         | n-dodecane    | 207.02        | [98]       |
| ambrein          | <i>E. coli</i>       | flask              | none          | 2.6           | [98]       |
|                  | <i>P. pastoris</i>   | bioreactor         | none          | 100           | [210]      |
| betulin          | <i>S. cerevisiae</i> | flask              | none          | 59.5          | [211]      |
| gypsogenin       | <i>S. cerevisiae</i> | bioreactor         | none          | 146.84        | [212]      |
| lupeol           | <i>S. cerevisiae</i> | flask              | none          | 200.1         | [213]      |
|                  |                      | flask              | none          | 23.6          | [211]      |
|                  |                      | flask              | none          | 213.7         | [214]      |
| $\alpha$ -amyrin | <i>S. cerevisiae</i> | bioreactor         | none          | 1100          | [214]      |
|                  |                      | bioreactor         | none          | 175.15        | [215]      |
|                  |                      | flask              | none          | 11.97         | [216]      |
|                  |                      | bioreactor         | none          | 138.8         | [217]      |
|                  |                      | bioreactor         | none          | 108           | [218]      |
| $\beta$ -Amyrin  | <i>S. cerevisiae</i> | tube               | none          | 6             | [219]      |
|                  |                      | bioreactor         | none          | 108.1         | [220]      |

|                   |                      |                      |                           |        |       |
|-------------------|----------------------|----------------------|---------------------------|--------|-------|
| ursolic acid      | <i>S. cerevisiae</i> | bioreactor           | none                      | 44.92  | [215] |
|                   |                      | flask                | none                      | 101.4  | [221] |
|                   |                      | flask                | none                      | 41.4   | [221] |
| betulinic acid    | <i>S. cerevisiae</i> | bioreactor           | none                      | 62.5   | [221] |
|                   |                      | bioreactor           | none                      | 123.27 | [222] |
|                   |                      | flask                | none                      | 91.6   | [221] |
|                   |                      | flask                | none                      | 16.5   | [221] |
|                   |                      | bioreactor           | none                      | 182    | [223] |
|                   |                      | bioreactor           | none                      | 1000   | [211] |
| morolic acid      | <i>S. cerevisiae</i> | bioreactor           | none                      | 26.7   | [221] |
|                   |                      | flask                | isopropyl myristate       | 51.87  | [224] |
|                   |                      | flask                | none                      | 68.3   | [221] |
|                   |                      | flask                | none                      | 24.3   | [221] |
|                   |                      | bioreactor           | none                      | 34.1   | [221] |
| oleanolic acid    | <i>S. cerevisiae</i> | flask                | none                      | 20.7   | [225] |
|                   |                      | bioreactor           | none                      | 606.9  | [226] |
|                   | <i>S. cerevisiae</i> | flask                | none                      | 186.1  | [226] |
|                   | <i>S. cerevisiae</i> | flask                | none                      | 21.4   | [227] |
| ganoderic acid    | <i>S. cerevisiae</i> | <i>S. cerevisiae</i> | none                      | 155.58 | [222] |
|                   |                      | bioreactor           | none                      |        |       |
| maslinic acid     | <i>S. cerevisiae</i> | flask                | none                      | 14.5   | [228] |
|                   |                      | bioreactor           | none                      |        |       |
| corosolic acid    | <i>S. cerevisiae</i> | bioreactor           | none                      | 384    | [229] |
| alphitolic acid   | <i>S. cerevisiae</i> | bioreactor           | none                      | 141    | [229] |
| quillaic acid     | <i>S. cerevisiae</i> | bioreactor           | none                      | 23     | [229] |
| polpunonic acid   | <i>S. cerevisiae</i> | bioreactor           | none                      | 314.01 | [212] |
| glycyrrhetic acid | <i>S. cerevisiae</i> | tube                 | none                      | 1.4    | [230] |
| dammarenediol-II  | <i>S. cerevisiae</i> | bioreactor           | none                      | 18.9   | [220] |
| protopanaxadiol   | <i>S. cerevisiae</i> | bioreactor           | none                      | 15000  | [231] |
|                   |                      | flask                | none                      | 211.52 | [232] |
|                   |                      | bioreactor           | none                      | 8088.8 | [233] |
|                   |                      | bioreactor           | methy l oleate/n-dodecane | 1548   | [234] |
|                   |                      | flask                | none                      | 8.63   | [235] |
|                   |                      | flask                | none                      | 17.2   | [227] |
|                   |                      | bioreactor           | none                      | 235    | [231] |
|                   |                      | bioreactor           | methy l oleate/n-dodecane | 1189   | [234] |
|                   |                      | bioreactor           | none                      | 9054.5 | [233] |
|                   |                      | bioreactor           | none                      | 1436.6 | [236] |
| protopanaxatriol  | <i>S. cerevisiae</i> | flask                | none                      | 15.9   | [227] |
| ginsenoside Rh2   | <i>S. cerevisiae</i> | bioreactor           | none                      | 300    | [237] |
|                   |                      | flask                | none                      | 16.9   | [238] |
|                   |                      | bioreactor           | none                      | 2250   | [233] |
| ginsenoside Rg3   | <i>S. cerevisiae</i> | bioreactor           | none                      | 1.3    | [239] |



|                 |                      |       |      |      |       |
|-----------------|----------------------|-------|------|------|-------|
|                 |                      | flask | none | 51.8 | [238] |
| ginsenoside RF1 | <i>S. cerevisiae</i> | flask | none | 42.1 | [240] |
| ginsenoside Rh1 | <i>S. cerevisiae</i> | flask | none | 92.8 | [240] |

Table S5. Summary of the fermentation results for tetraterpene, categorized by various chassis cells, fermentation types, the second phase, and production outputs.

| Tetraterpenes     | Chassis cells               | Fermentation types | Second phases | Titers (mg/L) | References |
|-------------------|-----------------------------|--------------------|---------------|---------------|------------|
| $\beta$ -carotene | <i>E. coli</i>              | flask              | none          | 503           | [241]      |
|                   |                             | flask              | none          | 464           | [242]      |
|                   |                             | bioreactor         | none          | 2100          | [243]      |
|                   |                             | bioreactor         | none          | 663           | [244]      |
|                   |                             | bioreactor         | none          | 3200          | [245]      |
|                   |                             | bioreactor         | none          | 390           | [246]      |
| lycopene          | <i>S. cerevisiae</i>        | tube               | none          | 477.9         | [247]      |
|                   | <i>E. coli</i>              | tube               | none          | 77.85         | [248]      |
|                   |                             | flask              | none          | 3520          | [248]      |
|                   |                             | flask              | none          | 1440          | [249]      |
|                   |                             | bioreactor         | none          | 128           | [250]      |
|                   |                             | flask              | none          | 358.9         | [251]      |
|                   |                             | flask              | none          | 224           | [252]      |
|                   |                             | bioreactor         | none          | 2700          | [253]      |
|                   |                             | flask              | none          | 2300          | [254]      |
|                   | <i>S. cerevisiae</i>        | bioreactor         | none          | 2370          | [255]      |
|                   |                             | bioreactor         | none          | 1610          | [256]      |
|                   |                             | bioreactor         | none          | 4200          | [257]      |
|                   | <i>Y. lipolytica</i>        | bioreactor         | none          | 4200          | [257]      |
|                   | <i>Mucor circinelloides</i> | flask              | none          | 54000         | [258]      |
|                   | <i>R. rubrum</i>            | flask              | none          | 15            | [259]      |
|                   | <i>R. sphaeroides</i>       | flask              | none          | 66.05         | [260]      |
|                   | <i>H. mediterranei</i>      | flask              | none          | 429.41        | [261]      |
|                   | <i>P. pastoris</i>          | bioreactor         | none          | 73.9          | [262]      |
| astaxanthin       | <i>E. coli</i>              | flask              | none          | 714           | [263]      |
|                   |                             | bioreactor         | none          | 880           | [264]      |
|                   |                             | bioreactor         | none          | 1820          | [265]      |
| crocetin          | <i>S. cerevisiae</i>        | bioreactor         | none          | 6.278         | [266]      |
| zeaxanthin        | <i>E. coli</i>              | flask              | none          | 43.46         | [267]      |
|                   |                             | bioreactor         | none          | 722.46        | [268]      |
|                   | <i>S. cerevisiae</i>        | tube               | none          | 1.5           | [269]      |
|                   | <i>P. putida</i>            | flask              | none          | 51.3          | [270]      |

Abbreviation of microorganisms: *R. rubrum*: *Rhodospirillum rubrum*; *H. mediterranei*: *Haloferax mediterranei*; *P. putida*:

## References

1. Liu, W., et al., *Engineering Escherichia coli for high-yield geraniol production with biotransformation of geranyl acetate to geraniol under fed-batch culture*. Biotechnology for Biofuels, 2016. **9**(1).
2. Xiao, L., et al., *Co-localizing key pathway enzymes by protein scaffold to enhance geraniol production in Escherichia coli*. Industrial Crops and Products, 2023. **203**.
3. Wang, X., et al., *Combined bioderivatization and engineering approach to improve the efficiency of geraniol production*. Green Chemistry, 2022. **24**(2): p. 864-876.
4. Zhou, J., et al., *Engineering Escherichia coli for selective geraniol production with minimized endogenous dehydrogenation*. Journal of Biotechnology, 2014. **169**: p. 42-50.
5. Zhou, J., et al., *Geranyl diphosphate synthase: An important regulation point in balancing a recombinant monoterpene pathway in Escherichia coli*. Enzyme and Microbial Technology, 2015. **68**: p. 50-55.
6. Tashiro, M., et al., *Directed evolution and expression tuning of geraniol synthase for efficient geraniol production in Escherichia coli*. The Journal of General and Applied Microbiology, 2017. **63**(5): p. 287-295.
7. Fischer, M.J.C., et al., *Metabolic engineering of monoterpene synthesis in yeast*. Biotechnology and Bioengineering, 2011. **108**(8): p. 1883-1892.
8. Liu, J., et al., *Overproduction of geraniol by enhanced precursor supply in Saccharomyces cerevisiae*. Journal of Biotechnology, 2013. **168**(4): p. 446-451.
9. Yee, D.A., et al., *Engineered mitochondrial production of monoterpenes in Saccharomyces cerevisiae*. Metabolic Engineering, 2019. **55**: p. 76-84.
10. Zhao, J., et al., *Improving monoterpene geraniol production through geranyl diphosphate synthesis regulation in Saccharomyces cerevisiae*. Applied Microbiology and Biotechnology, 2016. **100**: p. 4561 - 4571.
11. Zhao, J., et al., *Dynamic control of ERG20 expression combined with minimized endogenous downstream metabolism contributes to the improvement of geraniol production in Saccharomyces cerevisiae*. Microbial Cell Factories, 2017. **16**.
12. Jiang, G.-Z., et al., *Manipulation of GES and ERG20 for geraniol overproduction in Saccharomyces cerevisiae*. Metabolic Engineering, 2017. **41**: p. 57-66.
13. Li, M., S. Xu, and W. Lu, *Engineering Corynebacterium glutamicum for Geraniol Production*. Transactions of Tianjin University, 2020. **27**(5): p. 377-384.
14. Alonso-Gutierrez, J., et al., *Metabolic engineering of Escherichia coli for limonene and perillyl alcohol production*. Metabolic Engineering, 2013. **19**: p. 33-41.
15. Alonso-Gutierrez, J., et al., *Principal component analysis of proteomics (PCAP) as a tool to direct metabolic engineering*. Metabolic Engineering, 2015. **28**: p. 123-133.
16. Mendez-Perez, D., et al., *Production of jet fuel precursor monoterpenoids from engineered Escherichia coli*. Biotechnology and Bioengineering, 2017. **114**(8): p. 1703-1712.
17. Wu, J., et al., *Systematic Optimization of Limonene Production in Engineered Escherichia coli*. Journal of Agricultural and Food Chemistry, 2019. **67**(25): p. 7087-7097.
18. Willrodt, C., et al., *Decoupling production from growth by magnesium sulfate limitation boosts de novo limonene production*. Biotechnology and Bioengineering, 2015. **113**(6): p. 1305-1314.
19. Willrodt, C., et al., *Engineering the productivity of recombinant Escherichia coli for limonene formation from glycerol in minimal media*. Biotechnology Journal, 2014. **9**(8): p. 1000-1012.
20. Rolf, J., et al., *A Gram-Scale Limonene Production Process with Engineered Escherichia coli*. Molecules, 2020. **25**(8): p. 12.
21. Hu, Z., et al., *Improve the production of D-limonene by regulating the mevalonate pathway of Saccharomyces cerevisiae during alcoholic beverage fermentation*. Journal of industrial microbiology & biotechnology, 2020.

22. Jongedijk, E., et al., *Capturing of the monoterpene olefin limonene produced in Saccharomyces cerevisiae*. Yeast, 2014. **32**: p. 159 - 171.
23. Behrendorff, J.B.Y.H., et al., *2,2-Diphenyl-1-picrylhydrazyl as a screening tool for recombinant monoterpene biosynthesis*. Microbial Cell Factories, 2013. **12**: p. 76 - 76.
24. Dusséaux, S., et al., *Transforming yeast peroxisomes into microfactories for the efficient production of high-value isoprenoids*. Proceedings of the National Academy of Sciences, 2020. **117**: p. 31789 - 31799.
25. Ignea, C., et al., *Orthogonal monoterpene biosynthesis in yeast constructed on an isomeric substrate*. Nature Communications, 2019. **10**.
26. Peng, B., et al., *Engineered protein degradation of farnesyl pyrophosphate synthase is an effective regulatory mechanism to increase monoterpene production in Saccharomyces cerevisiae*. Metabolic engineering, 2018. **47**: p. 83-93.
27. Kong, X., et al., *Efficient Synthesis of Limonene in Saccharomyces cerevisiae Using Combinatorial Metabolic Engineering Strategies*. Journal of agricultural and food chemistry, 2023.
28. Cheng, S.J., et al., *Orthogonal Engineering of Biosynthetic Pathway for Efficient Production of Limonene in Saccharomyces cerevisiae*. ACS synthetic biology, 2019. **8** **5**: p. 968-975.
29. Zhang, X., et al., *Combinatorial engineering of Saccharomyces cerevisiae for improving limonene production*. Biochemical Engineering Journal, 2021. **176**: p. 108155.
30. Liu, S., et al., *Engineering Rhodosporidium toruloides for limonene production*. Biotechnology for Biofuels, 2021. **14**.
31. Zhao, D., et al., *Optimization of Fermentation Conditions for Elevating Limonene Production with Engineered Rhodosporidium toruloides*. Fermentation, 2023.
32. Muñoz-Fernández, G., et al., *Metabolic engineering of Ashbya gossypii for limonene production from xylose*. Biotechnology for Biofuels and Bioproducts, 2022. **15**.
33. Cao, X.H., et al., *Metabolic engineering of oleaginous yeast Yarrowia lipolytica for limonene overproduction*. Biotechnology for Biofuels, 2016. **9**.
34. Cheng, B., et al., *Elevating Limonene Production in Oleaginous Yeast Yarrowia lipolytica via Genetic Engineering of Limonene Biosynthesis Pathway and Optimization of Medium Composition*. Biotechnology and Bioprocess Engineering, 2019. **24**: p. 500 - 506.
35. Davies, F., et al., *Engineering Limonene and Bisabolene Production in Wild Type and a Glycogen-Deficient Mutant of Synechococcus sp. PCC 7002*. Frontiers in Bioengineering and Biotechnology, 2014. **2**.
36. Lin, P.-C., et al., *Metabolic engineering of the pentose phosphate pathway for enhanced limonene production in the cyanobacterium Synechocystis sp. PCC 6803*. Scientific Reports, 2017. **7**.
37. Lin, P.-C., F. Zhang, and H.B. Pakrasi, *Enhanced limonene production in a fast-growing cyanobacterium through combinatorial metabolic engineering*. Metabolic Engineering Communications, 2021. **12**.
38. Alonso-Gutiérrez, J., et al., *Metabolic engineering of Escherichia coli for limonene and perillyl alcohol production*. Metabolic engineering, 2013. **19**: p. 33-41.
39. Sun, C., et al., *Effectiveness of recombinant Escherichia coli on the production of (R)-(+)-perillyl alcohol*. BMC Biotechnology, 2020. **21**.
40. Kong, S., et al., *De novo biosynthesis of linalool from glucose in engineered Escherichia coli*. Enzyme and microbial technology, 2020. **140**: p. 109614.
41. Ferraz, C.A., et al., *Isopentenol Utilization Pathway for the Production of Linalool in Escherichia coli Using an Improved Bacterial Linalool/Nerolidol Synthase*. Chembiochem, 2021. **22**: p. 2325 - 2334.
42. Mendez-Perez, D., et al., *Production of jet fuel precursor monoterpenoids from engineered Escherichia coli*. Biotechnology and Bioengineering, 2017. **114**.
43. Wang, X., et al., *Efficient Myrcene Production Using Linalool Dehydratase Isomerase and Rational Biochemical Process in Escherichia coli*. Journal of biotechnology, 2023.

44. Wu, J., et al., *Synthetic Protein Scaffolds for Improving R-(-)-Linalool Production in Escherichia coli*. Journal of agricultural and food chemistry, 2021.
45. Amiri, P., et al., *Metabolic engineering of Saccharomyces cerevisiae for linalool production*. Biotechnology Letters, 2015. **38**: p. 503 - 508.
46. Deng, Y., et al., *Enhanced (S)-linalool production by fusion expression of farnesyl diphosphate synthase and linalool synthase in Saccharomyces cerevisiae*. Journal of Applied Microbiology, 2016. **121**.
47. Zhang, Y.C., et al., *High-level production of linalool by engineered Saccharomyces cerevisiae harboring dual mevalonate pathways in mitochondria and cytoplasm*. Enzyme and microbial technology, 2020. **134**: p. 109462.
48. Zhou, P., et al., *Improved linalool production in Saccharomyces cerevisiae by combining directed evolution of linalool synthase and overexpression of the complete mevalonate pathway*. Biochemical Engineering Journal, 2020. **161**: p. 107655.
49. Zhou, P., et al., *Combinatorial Modulation of Linalool Synthase and Farnesyl Diphosphate Synthase for Linalool Overproduction in Saccharomyces cerevisiae*. Journal of agricultural and food chemistry, 2021.
50. Cao, X.H., et al., *Enhancing linalool production by engineering oleaginous yeast Yarrowia lipolytica*. Bioresource technology, 2017. **245 Pt B**: p. 1641-1644.
51. Taratynova, M.O., et al., *Boosting Geranyl Diphosphate Synthesis for Linalool Production in Engineered Yarrowia lipolytica*. Applied biochemistry and biotechnology, 2023.
52. Hoshino, Y., et al., *Stereospecific linalool production utilizing two-phase cultivation system in Pantoea ananatis*. Journal of biotechnology, 2020. **324**: p. 21-27.
53. Nitta, N., et al., *Fermentative production of enantiopure (S)-linalool using a metabolically engineered Pantoea ananatis*. Microbial Cell Factories, 2021. **20**.
54. Shaw, J.J., et al., *Identification of a Fungal 1,8-Cineole Synthase from Hypoxylon sp. with Specificity Determinants in Common with the Plant Synthases\**. The Journal of Biological Chemistry, 2015. **290**: p. 8511 - 8526.
55. Karuppiiah, V., et al., *Structural Basis of Catalysis in the Bacterial Monoterpene Synthases Linalool Synthase and 1,8-Cineole Synthase*. ACS Catalysis, 2017. **7**: p. 6268 - 6282.
56. Ignea, C., et al., *Improving yeast strains using recyclable integration cassettes, for the production of plant terpenoids*. Microbial Cell Factories, 2011. **10**: p. 4 - 4.
57. Brown, S., et al., *De novo production of the plant-derived alkaloid strictosidine in yeast*. Proceedings of the National Academy of Sciences, 2015. **112**: p. 3205 - 3210.
58. Misa, J., et al., *Engineered Production of Strictosidine and Analogues in Yeast*. ACS synthetic biology, 2022.
59. Liu, H., et al., *High titer mevalonate fermentation and its feeding as a building block for isoprenoids (isoprene and sabinene) production in engineered Escherichia coli*. Process Biochemistry, 2017. **62**: p. 1-9.
60. Zhang, H., et al., *Microbial production of sabinene—a new terpene-based precursor of advanced biofuel*. Microbial Cell Factories, 2014. **13**: p. 20 - 20.
61. Ignea, C., et al., *Engineering monoterpene production in yeast using a synthetic dominant negative geranyl diphosphate synthase*. ACS synthetic biology, 2014. **3 5**: p. 298-306.
62. Yang, J., et al., *Metabolic engineering of Escherichia coli for the biosynthesis of alpha-pinene*. Biotechnology for Biofuels, 2013. **6**: p. 60 - 60.
63. Niu, F.-X., et al., *Enhancing Production of Pinene in Escherichia coli by Using a Combination of Tolerance, Evolution, and Modular Co-culture Engineering*. Frontiers in Microbiology, 2018. **9**.
64. Bao, S.-H., D.-y. Zhang, and E. Meng, *Improving biosynthetic production of pinene through plasmid recombination elimination and pathway optimization*. Plasmid, 2019: p. 102431.
65. Chen, T., Zhang, R.S., *Construction of pinene-producing artificial yeast cells*. CIESC 2019, 70(1): 179-188.
66. Ma, T., et al., *Synthesis of pinene in the industrial strain Candida glycerinogenes by modification of its mevalonate pathway*. Journal of Microbiology, 2022. **60**: p. 1191 - 1200.

67. Kim, E.-M., et al., *Microbial Synthesis of Myrcene by Metabolically Engineered Escherichia coli*. Journal of agricultural and food chemistry, 2015. **63** **18**: p. 4606-12.
68. Martin, V.J.J., et al., *Engineering a mevalonate pathway in Escherichia coli for production of terpenoids*. Nature Biotechnology, 2003. **21**: p. 796-802.
69. Zhang, C., et al., *Efflux transporter engineering markedly improves amorpha-4,11-diene production in Escherichia coli*. Biotechnology and Bioengineering, 2016. **113**.
70. Zhang, C., et al., *Combining Genotype Improvement and Statistical Media Optimization for Isoprenoid Production in E. coli*. PLoS ONE, 2013. **8**.
71. Pitera, D.J., et al., *Balancing a heterologous mevalonate pathway for improved isoprenoid production in Escherichia coli*. Metabolic engineering, 2007. **9** **2**: p. 193-207.
72. Anthony, J.R., et al., *Optimization of the mevalonate-based isoprenoid biosynthetic pathway in Escherichia coli for production of the anti-malarial drug precursor amorpha-4,11-diene*. Metabolic engineering, 2009. **11** **1**: p. 13-9.
73. Yuan, J. and C.B. Ching, *Combinatorial engineering of mevalonate pathway for improved amorpha-4,11-diene production in budding yeast*. Biotechnology and Bioengineering, 2014. **111**.
74. Wang, J.-f., et al., *Exploiting exogenous MEP pathway genes to improve the downstream isoprenoid pathway effects and enhance isoprenoid production in Escherichia coli*. Process Biochemistry, 2015. **50**: p. 24-32.
75. Wang, J.-F., et al., *Enhancing isoprenoid production through systematically assembling and modulating efflux pumps in Escherichia coli*. Applied Microbiology and Biotechnology, 2013. **97**: p. 8057-8067.
76. Redding-Johanson, A.M., et al., *Targeted proteomics for metabolic pathway optimization: application to terpene production*. Metabolic engineering, 2011. **13** **2**: p. 194-203.
77. Ma, S.M., et al., *Optimization of a heterologous mevalonate pathway through the use of variant HMG-CoA reductases*. Metabolic engineering, 2011. **13** **5**: p. 588-97.
78. Dahl, R.H., et al., *Engineering dynamic pathway regulation using stress-response promoters*. Nature Biotechnology, 2013. **31**: p. 1039-1046.
79. Newman, J.D., et al., *High-level production of amorpha-4,11-diene in a two-phase partitioning bioreactor of metabolically engineered Escherichia coli*. Biotechnology and Bioengineering, 2006. **95**.
80. Nowroozi, F.F., et al., *Metabolic pathway optimization using ribosome binding site variants and combinatorial gene assembly*. Applied Microbiology and Biotechnology, 2014. **98**: p. 1567-1581.
81. Tsuruta, H., et al., *High-Level Production of Amorpha-4,11-Diene, a Precursor of the Antimalarial Agent Artemisinin, in Escherichia coli*. PLoS ONE, 2009. **4**.
82. Shukal, S., X. Chen, and C. Zhang, *Systematic engineering for high-yield production of viridiflorol and amorpha-4,11-diene in auxotrophic Escherichia coli*. Metabolic engineering, 2019.
83. Lindahl, A., et al., *Production of the Artemisinin Precursor Amorpha-4,11-diene by Engineered Saccharomyces cerevisiae*. Biotechnology Letters, 2006. **28**: p. 571-580.
84. Meadows, A.L., et al., *Rewriting yeast central carbon metabolism for industrial isoprenoid production*. Nature, 2016. **537**: p. 694-697.
85. Shiba, Y., et al., *Engineering of the pyruvate dehydrogenase bypass in Saccharomyces cerevisiae for high-level production of isoprenoids*. Metabolic engineering, 2007. **9** **2**: p. 160-8.
86. Ro, D.-K., et al., *Production of the antimalarial drug precursor artemisinic acid in engineered yeast*. Nature, 2006. **440**: p. 940-943.
87. Kwak, S., et al., *Redirection of the Glycolytic Flux Enhances Isoprenoid Production in Saccharomyces Cerevisiae*. Biotechnology journal, 2020.
88. Özyayın, B., et al., *Carotenoid-based phenotypic screen of the yeast deletion collection reveals new genes with roles in isoprenoid production*. Metabolic engineering, 2013. **15**: p. 174-83.

89. Westfall, P., et al., *Production of amorphadiene in yeast, and its conversion to dihydroartemisinic acid, precursor to the antimalarial agent artemisinin*. Proceedings of the National Academy of Sciences, 2012. **109**: p. E111 - E118.
90. Paddon, C.J., et al., *High-level semi-synthetic production of the potent antimalarial artemisinin*. Nature, 2013. **496**: p. 528-532.
91. Marsafari, M. and P. Xu, *Debottlenecking mevalonate pathway for antimalarial drug precursor amorphadiene biosynthesis in Yarrowia lipolytica*. Metabolic Engineering Communications, 2020. **10**.
92. Yaegashi, J., et al., *Rhodospiridium toruloides: a new platform organism for conversion of lignocellulose into terpene biofuels and bioproducts*. Biotechnology for Biofuels, 2017. **10**.
93. Zhou, K., et al., *Optimization of amorphadiene synthesis in bacillus subtilis via transcriptional, translational, and media modulation*. Biotechnology and bioengineering, 2013. **110** 9: p. 2556-61.
94. Choi, S.Y., et al., *Photosynthetic conversion of CO<sub>2</sub> to farnesyl diphosphate-derived phytochemicals (amorphadiene and squalene) by engineered cyanobacteria*. Biotechnology for Biofuels, 2016. **9**.
95. Wang, C., et al., *Metabolic engineering of Escherichia coli for  $\alpha$ -farnesene production*. Metabolic engineering, 2011. **13** 6: p. 648-55.
96. Zhu, F., et al., *In vitro reconstitution of mevalonate pathway and targeted engineering of farnesene overproduction in Escherichia coli*. Biotechnology and Bioengineering, 2014. **111**.
97. Yang, X., et al., *Quorum sensing-mediated protein degradation for dynamic metabolic pathway control in Saccharomyces cerevisiae*. Metabolic engineering, 2021. **64**: p. 85-94.
98. Wang, J., et al., *Overproduction of  $\alpha$ -Farnesene in Saccharomyces cerevisiae by Farnesene Synthase Screening and Metabolic Engineering*. Journal of agricultural and food chemistry, 2021.
99. Han, J.Y., et al., *Ty1-fused protein-body formation for spatial organization of metabolic pathways in Saccharomyces cerevisiae*. Biotechnology and Bioengineering, 2018. **115**: p. 694 - 704.
100. Tippmann, S., et al., *Production of farnesene and santalene by Saccharomyces cerevisiae using fed-batch cultivations with RQ-controlled feed*. Biotechnology and bioengineering, 2016. **113** 1: p. 72-81.
101. Liu, Y., et al., *Engineering the oleaginous yeast Yarrowia lipolytica for production of  $\alpha$ -farnesene*. Biotechnology for Biofuels, 2019. **12**.
102. Yang, X., et al., *Heterologous production of  $\alpha$ -farnesene in metabolically engineered strains of Yarrowia lipolytica*. Bioresource technology, 2016. **216**: p. 1040-8.
103. Liu, Y., et al.,  *$\alpha$ -Farnesene production from lipid by engineered Yarrowia lipolytica*. Bioresources and Bioprocessing, 2021. **8**: p. 1-12.
104. Liu, S.-C., et al., *Pathway engineering and medium optimization for  $\alpha$ -farnesene biosynthesis in oleaginous yeast Yarrowia lipolytica*. Journal of biotechnology, 2020.
105. Lee, H.J., et al., *Direct Conversion of CO<sub>2</sub> to  $\alpha$ -Farnesene Using Metabolically Engineered Synechococcus elongatus PCC 7942*. Journal of agricultural and food chemistry, 2017. **65** 48: p. 10424-10428.
106. Paththarapachayakul, N., et al., *Evolutionary engineering of cyanobacteria to enhance the production of  $\alpha$ -farnesene from CO<sub>2</sub>*. Journal of agricultural and food chemistry, 2019.
107. Liu, H., et al., *Dual Regulation of Cytoplasm and Peroxisomes for Improved  $\alpha$ -Farnesene Production in Recombinant Pichia pastoris*. ACS synthetic biology, 2021.
108. Halfmann, C.T., et al., *Genetically engineering cyanobacteria to convert CO<sub>2</sub>, water, and light into the long-chain hydrocarbon farnesene*. Applied Microbiology and Biotechnology, 2014. **98**: p. 9869 - 9877.
109. Lv, J., et al., *Highly efficient production of FAMEs and  $\beta$ -farnesene from a two-stage biotransformation of waste cooking oils*. Energy Conversion and Management, 2019.
110. Yao, P., et al., *Investigation of fermentation conditions of biodiesel by-products for high production of  $\beta$ -farnesene by an engineered Escherichia coli*. Environmental Science and Pollution Research, 2020. **27**: p. 22758 - 22769.

111. You, S., et al., *Utilization of biodiesel by-product as substrate for high-production of  $\beta$ -farnesene via relatively balanced mevalonate pathway in Escherichia coli*. Bioresource technology, 2017. **243**: p. 228-236.
112. You, S., et al., *Recycling strategy and repression elimination for lignocellulosic-based farnesene production with an engineered Escherichia coli*. Journal of agricultural and food chemistry, 2019.
113. Arnesen, J.A., et al., *Yarrowia lipolytica Strains Engineered for the Production of Terpenoids*. Frontiers in Bioengineering and Biotechnology, 2020. **8**.
114. Shi, T., et al., *Engineering the oleaginous yeast Yarrowia lipolytica for  $\beta$ -farnesene overproduction*. Biotechnology Journal, 2021. **16**.
115. Kim, E.-M., et al., *Autonomous control of metabolic state by a quorum sensing (QS)-mediated regulator for bisabolene production in engineered E. coli*. Metabolic engineering, 2017. **44**: p. 325-336.
116. Alonso-Gutiérrez, J., et al., *Principal component analysis of proteomics (PCAP) as a tool to direct metabolic engineering*. Metabolic engineering, 2015. **28**: p. 123-133.
117. Alonso-Gutiérrez, J., et al., *Toward industrial production of isoprenoids in Escherichia coli: Lessons learned from CRISPR-Cas9 based optimization of a chromosomally integrated mevalonate pathway*. Biotechnology and Bioengineering, 2018. **115**: p. 1000 - 1013.
118. Peralta-Yahya, P., et al., *Identification and microbial production of a terpene-based advanced biofuel*. Nature Communications, 2011. **2**.
119. Han, G.H., et al., *Fermentative production and direct extraction of (–)- $\alpha$ -bisabolol in metabolically engineered Escherichia coli*. Microbial Cell Factories, 2016. **15**.
120. Sebesta, J. and C.A.M. Peebles, *Improving heterologous protein expression in Synechocystis sp. PCC 6803 for alpha-bisabolene production*. Metabolic Engineering Communications, 2019. **10**.
121. Wichmann, J., et al., *Tailored carbon partitioning for phototrophic production of (E)- $\alpha$ -bisabolene from the green microalga Chlamydomonas reinhardtii*. Metabolic engineering, 2018. **45**: p. 211-222.
122. Tan, N., et al., *High-Yield Biosynthesis of trans-Nerolidol from Sugar and Glycerol*. Journal of agricultural and food chemistry, 2023.
123. Peng, B., et al., *A squalene synthase protein degradation method for improved sesquiterpene production in Saccharomyces cerevisiae*. Metabolic engineering, 2017. **39**: p. 209-219.
124. Qu, Z., et al., *Overexpression of the transcription factor HAC1 improves nerolidol production in engineered yeast*. Enzyme and microbial technology, 2020. **134**: p. 109485.
125. Peng, B., et al., *Coupling gene regulatory patterns to bioprocess conditions to optimize synthetic metabolic modules for improved sesquiterpene production in yeast*. Biotechnology for Biofuels, 2017. **10**.
126. Zhang, L., et al., *Creation of a yeast cell factory for high production of nerol tertiary alcohols*. China Journal of Chinese Materia Medica, 2017. **42**(15): p. 7.
127. Li, W.-g., et al., *Characterization of trans-Nerolidol Synthase from Celastrus angulatus Maxim and Production of trans-Nerolidol in Engineered Saccharomyces cerevisiae*. Journal of agricultural and food chemistry, 2021.
128. Alemdar, S., et al., *Bioproduction of  $\alpha$ -humulene in metabolically engineered Escherichia coli and application in zerumbone synthesis*. Engineering in Life Sciences, 2017. **17**.
129. Harada, H., et al., *Efficient synthesis of functional isoprenoids from acetoacetate through metabolic pathway-engineered Escherichia coli*. Applied Microbiology and Biotechnology, 2009. **81**: p. 915-925.
130. Zhang, C., et al., *Harnessing yeast peroxisomes and cytosol acetyl-CoA for sesquiterpene  $\alpha$ -humulene production*. Journal of agricultural and food chemistry, 2020.
131. Zhou, L., et al., *Enhancement of Patchoulol Production in Escherichia coli via Multiple Engineering Strategies*. Journal of agricultural and food chemistry, 2021.
132. Aguilar, F., et al., *Whole-Cell Production of Patchouli Oil Sesquiterpenes in Escherichia coli: Metabolic Engineering and*

- Fermentation Optimization in Solid–Liquid Phase Partitioning Cultivation*. ACS Omega, 2020. **5**: p. 32436 - 32446.
133. Albertsen, L., et al., *Diversion of Flux toward Sesquiterpene Production in Saccharomyces cerevisiae by Fusion of Host and Heterologous Enzymes*. Applied and Environmental Microbiology, 2010. **77**: p. 1033 - 1040.
  134. Ma, B., et al., *Significantly enhanced production of patchoulol in metabolically engineered Saccharomyces cerevisiae*. Journal of agricultural and food chemistry, 2019.
  135. Liu, M., et al., *High-Level Production of Sesquiterpene Patchoulol in Saccharomyces cerevisiae*. ACS synthetic biology, 2021.
  136. Emmerstorfer, A., et al., *Over-expression of ICE2 stabilizes cytochrome P450 reductase in Saccharomyces cerevisiae and Pichia pastoris*. Biotechnology journal, 2015. **10 4**: p. 623-35.
  137. Cankar, K., et al., *Valencene oxidase CYP706M1 from Alaska cedar (Callitropsis nootkatensis)*. FEBS Letters, 2014. **588**.
  138. Ouyang, X., et al., *Production of valencene and its derivatives by recombinant brewer's yeast fermentation*. Food and Fermentation Industries Editorial Staff, 2019. **45(20)**: p. 9.
  139. Guo, X., et al., *Heterologous biosynthesis of (+)-nootkatone in unconventional yeast Yarrowia lipolytica*. Biochemical Engineering Journal, 2018.
  140. Frohwitter, J., et al., *Production of the sesquiterpene (+)-valencene by metabolically engineered Corynebacterium glutamicum*. Journal of biotechnology, 2014. **191**: p. 205-13.
  141. Beekwilder, J., et al., *Valencene synthase from the heartwood of Nootka cypress (Callitropsis nootkatensis) for biotechnological production of valencene*. Plant biotechnology journal, 2014. **12 2**: p. 174-82.
  142. Matsudaira, A., et al., *Production of glutamate and stereospecific flavors, (S)-linalool and (+)-valencene, by Synechocystis sp. PCC6803*. Journal of bioscience and bioengineering, 2020.
  143. Gao, Y., *The study of microbial synthesis of germacrene A the precursor of  $\beta$ -elemene*. 2012, Hangzhou Normal University.
  144. Chen, R., et al., *Protein Engineering of a Germacrene A Synthase From Lactuca sativa and Its Application in High Productivity of Germacrene A in Escherichia coli*. Frontiers in Plant Science, 2022. **13**.
  145. Li, M., et al., *Co-biosynthesis of germacrene A, a precursor of  $\beta$ -elemene, and lycopene in engineered Escherichia coli*. Applied Microbiology and Biotechnology, 2022. **106**: p. 8053 - 8066.
  146. Fordjour, E., et al., *Engineering Escherichia coli BL21 (DE3) for high-yield production of germacrene A, a precursor of  $\beta$ -elemene via combinatorial metabolic engineering strategies*. Biotechnology and Bioengineering, 2023. **120**: p. 3039 - 3056.
  147. Bröker, J.N., et al., *Combinatorial Metabolic Engineering in Saccharomyces cerevisiae for the Enhanced Production of the FPP-Derived Sesquiterpene Germacrene*. Bioengineering, 2020. **7**.
  148. *Metabolic engineering of Saccharomyces cerevisiae for production of germacrene A, a precursor of beta-elemene*. Journal of Industrial Microbiology & Biotechnology, 2017. **44**: p. 1065-1072.
  149. Zhang, X., et al., *A recombinant bacterium and its use*. 2021.
  150. Zhang, W., et al., *Improved production of germacrene A, a direct precursor of  $\beta$ -elemene, in engineered Saccharomyces cerevisiae by expressing a cyanobacterial germacrene A synthase*. Microbial Cell Factories, 2020. **20**.
  151. Cheng, J., et al., *Development of a Pichia pastoris cell factory for efficient production of germacrene A: a precursor of  $\beta$ -elemene*. Bioresources and Bioprocessing, 2023. **10**: p. 1-9.
  152. Ye, M., J. Gao, and Y.J. Zhou, *Global metabolic rewiring of the nonconventional yeast Ogataea polymorpha for biosynthesis of the sesquiterpenoid  $\beta$ -elemene*. Metabolic engineering, 2023.
  153. Liu, Q., et al., *Reprogramming the metabolism of oleaginous yeast for sustainably biosynthesizing the anticarcinogen precursor germacrene A*. Green Chemistry, 2023.
  154. Zhang, J., et al., *Sesquiterpene Synthase Engineering and Targeted Engineering of  $\alpha$ -Santalene Overproduction in Escherichia coli*. Journal of agricultural and food chemistry, 2022.
  155. Scalcinati, G., et al., *Dynamic control of gene expression in Saccharomyces cerevisiae engineered for the production of plant*



- sesquiterpene  $\alpha$ -santalene in a fed-batch mode*. Metabolic engineering, 2012. **14** 2: p. 91-103.
156. Asadollahi, M.A., et al., *Production of plant sesquiterpenes in Saccharomyces cerevisiae: Effect of ERG9 repression on sesquiterpene biosynthesis*. Biotechnology and Bioengineering, 2008. **99**.
  157. Jia, D., et al., *Yarrowia lipolytica construction for heterologous synthesis of  $\alpha$ -santalene and fermentation optimization*. Applied Microbiology and Biotechnology, 2019. **103**: p. 3511 - 3520.
  158. Wu, W., F. Liu, and R.W. Davis, *Engineering Escherichia coli for the production of terpene mixture enriched in caryophyllene and caryophyllene alcohol as potential aviation fuel compounds*. Metabolic Engineering Communications, 2018. **6**: p. 13 - 21.
  159. Yang, J., et al., *Biosynthesis of  $\beta$ -caryophyllene, a novel terpene-based high-density biofuel precursor, using engineered Escherichia coli*. Renewable Energy, 2016. **99**: p. 216-223.
  160. Yang, J. and Q. Nie, *Engineering Escherichia coli to convert acetic acid to  $\beta$ -caryophyllene*. Microbial Cell Factories, 2016. **15**.
  161. Cheng, T., et al., *Highly efficient biosynthesis of  $\beta$ -caryophyllene with a new sesquiterpene synthase from tobacco*. Biotechnology for Biofuels and Bioproducts, 2022. **15**.
  162. Li, X., et al., *Production of sesquiterpenoids  $\alpha$ -neoclovene and  $\beta$ -caryophyllene by engineered Saccharomyces cerevisiae*. Synthetic Biology Journal, 2021(005): p. 002.
  163. Melillo, E., et al., *Production of  $\alpha$ -cuprenene in Xanthophyllomyces dendrorhous: a step closer to a potent terpene biofactory*. Microbial Cell Factories, 2013. **12**: p. 13 - 13.
  164. Cao, Y., et al., *Manipulation of the precursor supply for high-level production of longifolene by metabolically engineered Escherichia coli*. Scientific Reports, 2019. **9**.
  165. Aguilar, F., T. Scheper, and S. Beutel, *Improved Production and In Situ Recovery of Sesquiterpene (+)-Zizaene from Metabolically-Engineered E. coli*. Molecules, 2019. **24**.
  166. Nybo, S.E., J. Saunders, and S.P. McCormick, *Metabolic engineering of Escherichia coli for production of valerenadiene*. Journal of biotechnology, 2017. **262**: p. 60-66.
  167. Yang, L., et al., *Combinatorial engineering of hybrid mevalonate pathways in Escherichiacoli for protoilludene production*. Microbial Cell Factories, 2016. **15**.
  168. Zada, B., et al., *Metabolic engineering of Escherichia coli for production of mixed isoprenoid alcohols and their derivatives*. Biotechnology for Biofuels, 2018. **11**.
  169. Zhuang, X. and J. Chappell, *Building terpene production platforms in yeast*. Biotechnology and Bioengineering, 2015. **112**.
  170. Liu, C.-L., et al., *Renewable production of high density jet fuel precursor sesquiterpenes from Escherichia coli*. Biotechnology for Biofuels, 2018. **11**.
  171. Wong, J.Y.F., et al., *De novo synthesis of the sedative valerenic acid in Saccharomyces cerevisiae*. Metabolic engineering, 2018. **47**: p. 94-101.
  172. Zhang, C., et al., *Production of sesquiterpenoid zerumbone from metabolic engineered Saccharomyces cerevisiae*. Metabolic engineering, 2018. **49**: p. 28-35.
  173. Geiselman, G.M., et al., *Conversion of poplar biomass into high-energy density tricyclic sesquiterpene jet fuel blendstocks*. Microbial Cell Factories, 2020. **19**.
  174. Zha, W.-l., et al., *Reconstruction of the Biosynthetic Pathway of Santalols under Control of the GAL Regulatory System in Yeast*. ACS synthetic biology, 2020.
  175. Dai, Z., et al., *Production of miltiradiene by metabolically engineered Saccharomyces cerevisiae*. Biotechnology and Bioengineering, 2012. **109**.
  176. Hu, T., et al., *Engineering chimeric diterpene synthases and isoprenoid biosynthetic pathways enables high-level production of miltiradiene in yeast*. Metabolic engineering, 2020.
  177. Zhou, Y.J., et al., *Modular pathway engineering of diterpenoid synthases and the mevalonic acid pathway for miltiradiene*

- production*. Journal of the American Chemical Society, 2012. **134** 6: p. 3234-41.
178. Kildegaard, K.R., et al., *Tailored biosynthesis of gibberellin plant hormones in yeast*. Metabolic Engineering, 2021. **66**: p. 1 - 11.
  179. Huang, Q., et al., *Engineering Escherichia coli for the synthesis of taxadiene, a key intermediate in the biosynthesis of taxol*. Bioorganic & medicinal chemistry, 2001. **9** 9: p. 2237-42.
  180. Biggs, B.W., et al., *Overcoming heterologous protein interdependency to optimize P450-mediated Taxol precursor synthesis in Escherichia coli*. Proceedings of the National Academy of Sciences, 2016. **113**: p. 3209 - 3214.
  181. Ajikumar, P.K., et al., *Isoprenoid Pathway Optimization for Taxol Precursor Overproduction in Escherichia coli*. Science, 2010. **330**: p. 70 - 74.
  182. Zhou, K., et al., *Distributing a metabolic pathway among a microbial consortium enhances production of natural products*. Nature biotechnology, 2015. **33**: p. 377 - 383.
  183. Engels, B., P. Dahm, and S. Jennewein, *Metabolic engineering of taxadiene biosynthesis in yeast as a first step towards Taxol (Paclitaxel) production*. Metabolic engineering, 2008. **10** 3-4: p. 201-6.
  184. Nowrouzi, B., et al., *Enhanced production of taxadiene in Saccharomyces cerevisiae*. Microbial Cell Factories, 2020. **19**.
  185. El-Sayed, E.-S.R., et al., *Strain improvement and immobilization technique for enhanced production of the anticancer drug paclitaxel by Aspergillus fumigatus and Alternaria tenuissima*. Applied Microbiology and Biotechnology, 2019. **103**: p. 8923 - 8935.
  186. Walls, L.E., et al., *Optimizing the biosynthesis of oxygenated and acetylated Taxol precursors in Saccharomyces cerevisiae using advanced bioprocessing strategies*. Biotechnology and Bioengineering, 2020. **118**: p. 279 - 293.
  187. Kong, M.K., et al., *Metabolic engineering of the Stevia rebaudiana ent-kaurene biosynthetic pathway in recombinant Escherichia coli*. Journal of biotechnology, 2015. **214**: p. 95-102.
  188. Moon, J.H., et al., *Redesign and reconstruction of a steviol-biosynthetic pathway for enhanced production of steviol in Escherichia coli*. Microbial Cell Factories, 2020. **19**.
  189. Geiselman, G.M., et al., *Production of ent-kaurene from lignocellulosic hydrolysate in Rhodosporidium toruloides*. Microbial Cell Factories, 2020. **19**.
  190. Tokuhira, K., et al., *Overproduction of Geranylgeraniol by Metabolically Engineered Saccharomyces cerevisiae*. Applied and Environmental Microbiology, 2009. **75**: p. 5536 - 5543.
  191. Wang, J., et al., *Enhancing Geranylgeraniol Production by Metabolic Engineering and Utilization of Isoprenol as a Substrate in Saccharomyces cerevisiae*. Journal of agricultural and food chemistry, 2021.
  192. Song, T.-Q., et al., *Engineering Saccharomyces cerevisiae for geranylgeraniol overproduction by combinatorial design*. Scientific Reports, 2017. **7**.
  193. Sun, Y., et al., *De novo production of versatile oxidized kaurene diterpenes in Escherichia coli*. Metabolic engineering, 2022.
  194. Wei, P., et al., *Metabolic Engineering of Saccharomyces cerevisiae for Heterologous Carnosic Acid Production*. Frontiers in Bioengineering and Biotechnology, 2022. **10**.
  195. Schalk, M., et al., *Toward a biosynthetic route to sclareol and amber odorants*. Journal of the American Chemical Society, 2012. **134** 46: p. 18900-3.
  196. Ignea, C., et al., *Efficient diterpene production in yeast by engineering Erg20p into a geranylgeranyl diphosphate synthase*. Metabolic engineering, 2015. **27**: p. 65-75.
  197. Ignea, C., et al., *Reconstructing the chemical diversity of labdane-type diterpene biosynthesis in yeast*. Metabolic engineering, 2015. **28**: p. 91-103.
  198. Cao, X.H., et al., *Engineering yeast for high-level production of diterpenoid sclareol*. Metabolic engineering, 2022.
  199. Leonard, E., et al., *Combining metabolic and protein engineering of a terpenoid biosynthetic pathway for overproduction and selectivity control*. Proceedings of the National Academy of Sciences, 2010. **107**: p. 13654 - 13659.
  200. Liu, T., C. Zhang, and W. Lu, *Heterologous production of levopimaric acid in Saccharomyces cerevisiae*. Microbial Cell

Factories, 2018. **17**.

201. Xu, Y., et al., *De novo biosynthesis of rubusoside and rebaudiosides in engineered yeasts*. Nature Communications, 2022. **13**.
202. Zhang, C., et al., *A “plug-n-play” modular metabolic system for the production of apocarotenoids*. Biotechnology and Bioengineering, 2018. **115**: p. 174 - 183.
203. Hu, Q., et al., *Selective biosynthesis of retinol in S. cerevisiae*. Bioresources and Bioprocessing, 2022. **9**: p. 1-14.
204. Park, H.G., et al., *Efficient production of retinol in Yarrowia lipolytica by increasing stability using antioxidant and detergent extraction*. Metabolic engineering, 2022.
205. Zhang, C., et al., *High-titer production of 13R-manoyl oxide in metabolically engineered Saccharomyces cerevisiae*. Microbial Cell Factories, 2019. **18**.
206. Pateraki, I., et al., *Total biosynthesis of the cyclic AMP booster forskolin from Coleus forskohlii*. eLife, 2017. **6**.
207. Li, L., et al., *Combinatorial Engineering of Mevalonate Pathway and Diterpenoid Synthases in Escherichia coli for cis-Abienol Production*. Journal of agricultural and food chemistry, 2019. **67** **23**: p. 6523-6531.
208. Wei, L., et al., *Improved squalene production through increasing lipid contents in Saccharomyces cerevisiae*. Biotechnology and Bioengineering, 2018. **115**: p. 1793 - 1800.
209. Li, T., et al., *Metabolic engineering of Saccharomyces cerevisiae to overproduce squalene*. Journal of agricultural and food chemistry, 2020.
210. Moser, S., et al., *Whole-cell (+)-ambrein production in the yeast Pichia pastoris*. Metabolic Engineering Communications, 2018. **7**: p. e00077 - e00077.
211. Huang, J., et al., *Identification of RoCYP01 (CYP716A155) enables construction of engineered yeast for high-yield production of betulinic acid*. Applied Microbiology and Biotechnology, 2019. **103**: p. 7029 - 7039.
212. Li, W., et al., *De Novo Biosynthesis of the Oleanane-Type Triterpenoids of Tunicosaponins in Yeast*. ACS synthetic biology, 2021.
213. Qiao, W., et al., *Improving lupeol production in yeast by recruiting pathway genes from different organisms*. Scientific Reports, 2019. **9**.
214. Yu, Y., et al., *Engineering Saccharomyces cerevisiae for high yield production of  $\alpha$ -amyrin via synergistic remodeling of  $\alpha$ -amyrin synthase and expanding the storage pool*. Metabolic engineering, 2020.
215. Jin, K., et al., *Combinatorial metabolic engineering enables the efficient production of ursolic acid and oleanolic acid in Saccharomyces cerevisiae*. Bioresource technology, 2023: p. 128819.
216. Yu, Y., et al., *Productive Amyrin Synthases for Efficient  $\alpha$ -Amyrin Synthesis in Engineered Saccharomyces cerevisiae*. ACS synthetic biology, 2018. **7** **10**: p. 2391-2402.
217. Zhang, G., et al., *Refactoring  $\beta$ -amyrin synthesis in Saccharomyces cerevisiae*. Aiche Journal, 2015. **61**: p. 3172-3179.
218. Muhammad Saad Ahmed, P.D., et al., *Design and construction of short synthetic terminators for  $\beta$ -amyrin production in Saccharomyces cerevisiae*. Biochemical Engineering Journal, 2019.
219. Kirby, J., et al., *Engineering triterpene production in Saccharomyces cerevisiae— $\beta$ -amyrin synthase from Artemisia annua*. The FEBS Journal, 2008. **275**.
220. Zhu, M.D., et al., *Boosting 11-oxo- $\beta$ -amyrin and glycyrrhetic acid synthesis in Saccharomyces cerevisiae via pairing novel oxidation and reduction system from legume plants*. Metabolic engineering, 2018. **45**: p. 43-50.
221. Gao, H., *Construction of cell factories for production of pentacyclic triterpenoids in Saccharomyces cerevisiae*. 2021.
222. Lu, C., et al., *Biosynthesis of ursolic acid and oleanolic acid in Saccharomyces cerevisiae*. Aiche Journal, 2018. **64**: p. 3794-3802.
223. Czarnotta, E., et al., *Fermentation and purification strategies for the production of betulinic acid and its lupane-type precursors in Saccharomyces cerevisiae*. Biotechnology and Bioengineering, 2017. **114**: p. 2528 - 2538.
224. Jin, C.-C., et al., *Boosting the biosynthesis of betulinic acid and related triterpenoids in Yarrowia lipolytica via multimodular metabolic engineering*. Microbial Cell Factories, 2019. **18**.

225. Srisawat, P., et al., *Production of the bioactive plant-derived triterpenoid morolic acid in engineered Saccharomyces cerevisiae*. Biotechnology and Bioengineering, 2020. **117**: p. 2198 - 2208.
226. Zhao, Y.-j., et al., *Enhancing oleanolic acid production in engineered Saccharomyces cerevisiae*. Bioresource technology, 2018. **257**: p. 339-343.
227. Dai, Z., et al., *Producing aglycons of ginsenosides in bakers' yeast*. Scientific Reports, 2014. **4**.
228. Wang, W.-F., H. Xiao, and J.-J. Zhong, *Biosynthesis of a ganoderic acid in Saccharomyces cerevisiae by expressing a cytochrome P450 gene from Ganoderma lucidum*. Biotechnology and Bioengineering, 2018. **115**: p. 1842 - 1854.
229. Dai, Z., et al., *Identification of a novel cytochrome P450 enzyme that catalyzes the C-2 $\alpha$  hydroxylation of pentacyclic triterpenoids and its application in yeast cell factories*. Metabolic engineering, 2019. **51**: p. 70-78.
230. Hansen, N.L., et al., *Integrating pathway elucidation with yeast engineering to produce polpunonic acid the precursor of the anti-obesity agent celastrol*. Microbial Cell Factories, 2020. **19**.
231. Wang, D., et al., *Construction of efficient yeast cell factories for production of ginsenosides precursor dammarenediol-II*. Acta Pharmaceutica Sinica B, 2018. **053**(008): p. 1233-1241.
232. zhang, x., *Performance Optimization of Saccharomyces cerevisiae for Dammarendiol-II Production* 2015, Tianjin University.
233. Wang, P., et al., *Synthesizing ginsenoside Rh2 in Saccharomyces cerevisiae cell factory at high-efficiency*. Cell Discovery, 2019. **5**.
234. Dai, Z., et al., *Metabolic engineering of Saccharomyces cerevisiae for production of ginsenosides*. Metabolic engineering, 2013. **20**: p. 146-56.
235. Li, D., et al., *Heterologous biosynthesis of triterpenoid dammarenediol-II in engineered Escherichia coli*. Biotechnology Letters, 2016. **38**: p. 603 - 609.
236. Zhao, F., et al., *Optimization of a cytochrome P450 oxidation system for enhancing protopanaxadiol production in Saccharomyces cerevisiae*. Biotechnology and Bioengineering, 2016. **113**.
237. Yu, Z., et al., *Biosynthesis of plant-derived ginsenoside Rh2 in yeast via repurposing a key promiscuous microbial enzyme*. Metabolic engineering, 2017. **42**: p. 25-32.
238. Wang, P., et al., *Production of bioactive ginsenosides Rh2 and Rg3 by metabolically engineered yeasts*. Metabolic engineering, 2015. **29**: p. 97-105.
239. Jung, S.-C., et al., *Two ginseng UDP-glycosyltransferases synthesize ginsenoside Rg3 and Rd*. Plant & cell physiology, 2014. **55** **12**: p. 2177-88.
240. Wei, W., et al., *Characterization of Panax ginseng UDP-Glycosyltransferases Catalyzing Protopanaxatriol and Biosyntheses of Bioactive Ginsenosides F1 and Rh1 in Metabolically Engineered Yeasts*. Molecular plant, 2015. **8** **9**: p. 1412-24.
241. Yoon, S.H., et al., *Increased  $\beta$ -Carotene Production in Recombinant Escherichia coli Harboring an Engineered Isoprenoid Precursor Pathway with Mevalonate Addition*. Biotechnology Progress, 2008. **23**.
242. Yoon, S.H., et al., *Combinatorial expression of bacterial whole mevalonate pathway for the production of beta-carotene in E. coli*. Journal of biotechnology, 2009. **140** **3-4**: p. 218-26.
243. Zhao, J., et al., *Engineering central metabolic modules of Escherichia coli for improving  $\beta$ -carotene production*. Metabolic engineering, 2013. **17**: p. 42-50.
244. Kim, J.H., et al., *Production of  $\beta$ -carotene by recombinant Escherichia coli with engineered whole mevalonate pathway in batch and fed-batch cultures*. Biotechnology and Bioprocess Engineering, 2009. **14**: p. 559-564.
245. Yang, J. and L. Guo, *Biosynthesis of  $\beta$ -carotene in engineered E. coli using the MEP and MVA pathways*. Microbial Cell Factories, 2014. **13**.
246. Kim, S.-W., et al., *Over-production of beta-carotene from metabolically engineered Escherichia coli*. Biotechnology letters, 2006. **28** **12**: p. 897-904.
247. Fathi, Z., et al., *Metabolic engineering of Saccharomyces cerevisiae for production of  $\beta$ -carotene from hydrophobic substrates*. FEMS Yeast Research, 2020. **21**.

248. Chen, Y., et al., *Chromosomal evolution of Escherichia coli for the efficient production of lycopene*. BMC Biotechnology, 2013. **13**: p. 6 - 6.
249. Zhu, F., et al., *Targeted engineering and scale up of lycopene overproduction in Escherichia coli*. Process Biochemistry, 2015. **50**: p. 341-346.
250. Huang, L., et al., *Engineering of global regulator cAMP receptor protein (CRP) in Escherichia coli for improved lycopene production*. Journal of biotechnology, 2015. **199**: p. 55-61.
251. Wu, T., et al., *Engineering membrane morphology and manipulating synthesis for increased lycopene accumulation in Escherichia coli cell factories*. 3 Biotech, 2018. **8**: p. 1-8.
252. Wei, Y., et al., *Enhanced production of biosynthesized lycopene via heterogenous MVA pathway based on chromosomal multiple position integration strategy plus plasmid systems in Escherichia coli*. Bioresource technology, 2018. **250**: p. 382-389.
253. Liu, N., et al., *Lycopene production from glucose, fatty acid and waste cooking oil by metabolically engineered Escherichia coli*. Biochemical Engineering Journal, 2020. **155**: p. 107488.
254. Kang, W., et al., *Modular enzyme assembly for enhanced cascade biocatalysis and metabolic flux*. Nature Communications, 2019. **10**.
255. Ma, T., et al., *Lipid engineering combined with systematic metabolic engineering of Saccharomyces cerevisiae for high-yield production of lycopene*. Metabolic engineering, 2019. **52**: p. 134-142.
256. Xie, W., et al., *Construction of lycopene-overproducing Saccharomyces cerevisiae by combining directed evolution and metabolic engineering*. Metabolic engineering, 2015. **30**: p. 69-78.
257. Luo, Z., et al., *Enhancing isoprenoid synthesis in Yarrowia lipolytica by expressing the isopentenol utilization pathway and modulating intracellular hydrophobicity*. Metabolic engineering, 2020.
258. Nicolás-Molina, F.E., E. Navarro, and R.M. Ruiz-Vazquez, *Lycopene over-accumulation by disruption of the negative regulator gene crgA in Mucor circinelloides*. Applied Microbiology and Biotechnology, 2008. **78**: p. 131-137.
259. Wang, G.-S., et al., *High-Level Production of the Industrial Product Lycopene by the Photosynthetic Bacterium Rhodospirillum rubrum*. Applied and Environmental Microbiology, 2012. **78**: p. 7205 - 7215.
260. Su, A., et al., *Metabolic Redesign of Rhodobacter sphaeroides for Lycopene Production*. Journal of agricultural and food chemistry, 2018. **66** **23**: p. 5879-5885.
261. Zuo, Z., et al., *Engineering Haloferax mediterranei as an Efficient Platform for High Level Production of Lycopene*. Frontiers in Microbiology, 2018. **9**.
262. Bhataya, A., C. Schmidt-Dannert, and P.-C. Lee, *Metabolic engineering of Pichia pastoris X-33 for lycopene production*. Process Biochemistry, 2009. **44**: p. 1095-1102.
263. Zhang, X., et al., *Production of lycopene by metabolically engineered Pichia pastoris*. Bioscience, Biotechnology, and Biochemistry, 2019. **84**: p. 463 - 470.
264. Li, D., et al., *Engineering CrtW and CrtZ for improving biosynthesis of astaxanthin in Escherichia coli*. Chinese journal of natural medicines, 2020. **18** **9**: p. 666-676.
265. Zhang, M., et al., *Improving astaxanthin production in Escherichia coli by co-utilizing CrtZ enzymes with different substrate preference*. Microbial Cell Factories, 2022. **21**.
266. Chai, F., et al., *Heterologous biosynthesis and manipulation of crocetin in Saccharomyces cerevisiae*. Microbial Cell Factories, 2017. **16**.
267. Li, X.-R., et al., *Metabolic engineering of Escherichia coli to produce zeaxanthin*. Journal of Industrial Microbiology & Biotechnology, 2015. **42**: p. 627-636.
268. Shen, H., et al., *Dynamic control of the mevalonate pathway expression for improved zeaxanthin production in Escherichia coli and comparative proteome analysis*. Metabolic engineering, 2016. **38**: p. 180-190.
269. Liang, J., J.C. Ning, and H. Zhao, *Coordinated induction of multi-gene pathways in Saccharomyces cerevisiae*. Nucleic

Acids Research, 2012. **41**: p. e54 - e54.

270. Beuttler, H., et al., *Biosynthesis of zeaxanthin in recombinant Pseudomonas putida*. Applied Microbiology and Biotechnology, 2011. **89**: p. 1137-1147.
